# Supplementary material
Source: publisher figshare collection journal article supplement (https://acs.figshare.com/ndownloader/files/25721070)
Supplement: Supplementary file 1 [file 25721070]

## **SUPPORTING INFORMATION**

### **The upgrading of bio-oil from the intermediate pyrolysis of waste biomass using steel slag as a catalyst**

*João Santos <sup>a</sup>, Hessam Jahangiri <sup>a\*</sup>, Muhammad Asif Bashir <sup>a</sup>, Andreas Hornung <sup>abc</sup>, Miloud Ouadi <sup>a</sup>*

<sup>a</sup> University of Birmingham, School of Chemical Engineering, Edgbaston, Birmingham, B15 2TT, UK.

<sup>b</sup> Fraunhofer UMSICHT, Fraunhofer Institute for Environmental, Safety and Energy Technology, An der Maxhütte 1, 92237 Sulzbach-Rosenberg, Germany.

<sup>c</sup> Friedrich-Alexander University Erlangen-Nuremberg, Schlossplatz 4, 91054 Erlangen, Germany.

#### **CORRESPONDING AUTHOR**

\*Tel: +44 (0) 121 414 5304

\*E-mail: [h.jahangiri@bham.ac.uk](mailto:h.jahangiri@bham.ac.uk)

**THE NUMBER OF PAGES: 8**

**THE NUMBER OF FIGURES: 6**

**THE NUMBER OF TABLES: 2**

#### **INFORMATION**

TCR (2 kg/h) unit at Fraunhofer UMSICHT, Germany (**Figure S1**), Process path flow diagram of the TCR plant (**Figure S2**), Feedstock characterization (**Table S1**), Steel slag metal composition (**Table S2**), GC-MS chromatograms of SB bio-oil and compounds detected at 400 and 500 °C (pyrolysis and reforming temperatures) and different SS ratios in the reformer (**Figure S3**), GC-MS chromatograms of OH bio-oil and compounds detected at 400 and 500 °C (pyrolysis and reforming temperatures) and different SS ratios in the reformer (**Figure S4**), GC-MS chromatograms of OH bio-oil and compounds detected at 400 and 500 °C (pyrolysis and reforming temperatures) and different SS ratios in the OH feed (**Figure S5**), X-ray diffractions of SS, SB raw, SB char, OH raw and OH char (**Figure S6**).

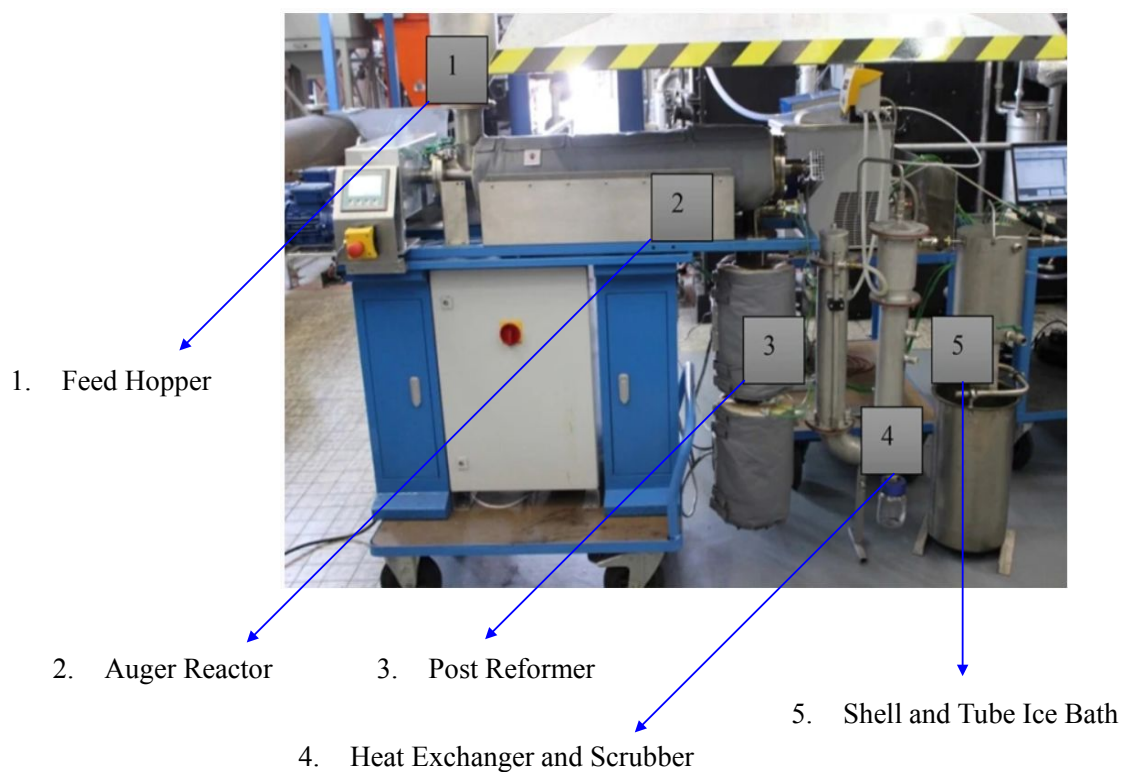

**Figure S1.** TCR (2 kg/h) unit at Fraunhofer UMSICHT, Germany. Reprinted with permission from ref. <sup>50</sup>, Copyright © 2019, American Chemical Society.

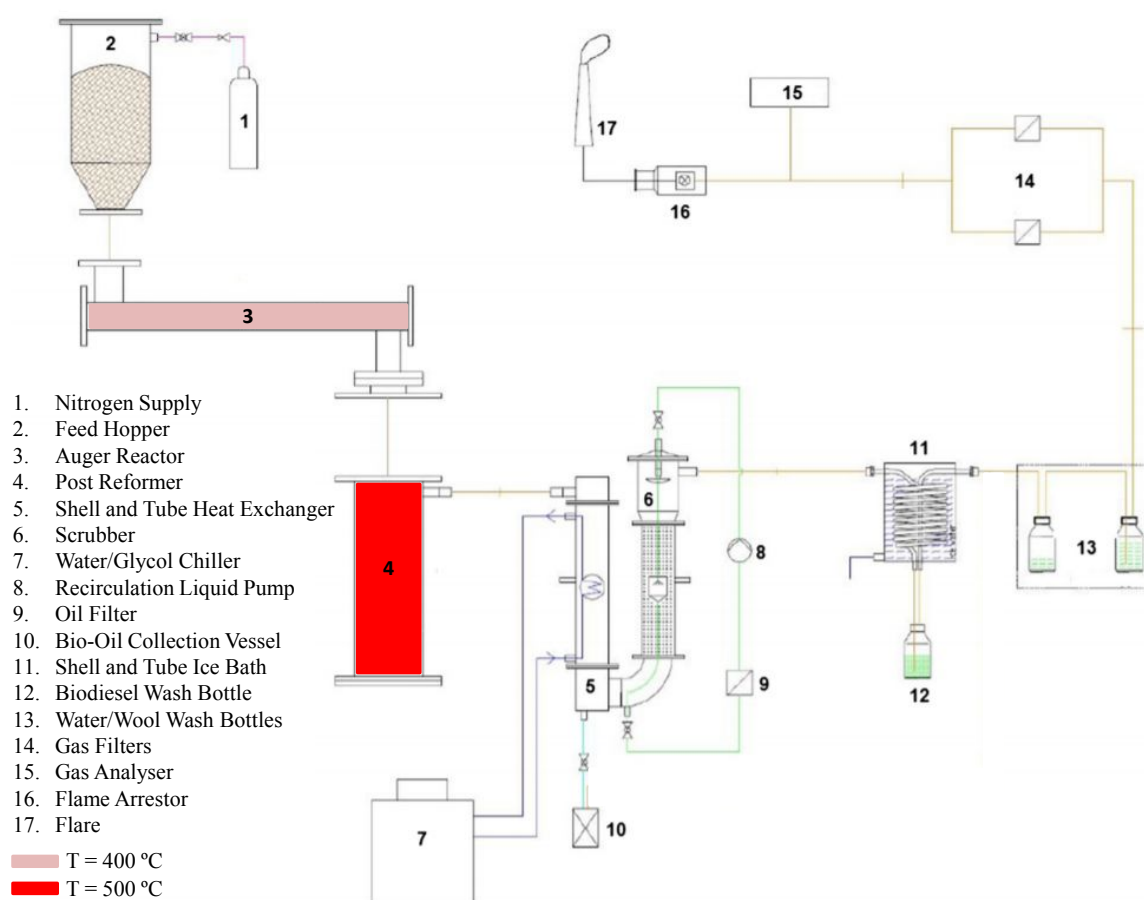

**Figure S2.** Process path flow diagram of the TCR plant. Reprinted with permission from ref.  
<sup>51</sup>, Copyright © 2017, Elsevier.

**Table S1.** Feedstock characterization.

|                                         | <b>SB</b> | <b>OH</b> |
|-----------------------------------------|-----------|-----------|
| Ultimate analysis (moisture-free basis) |           |           |
| C (wt%)                                 | 43.7      | 40.6      |
| H (wt%)                                 | 5.1       | 6.0       |
| N (wt%)                                 | 0.1       | 1.1       |
| S (wt%)                                 | 0.6       | <0.1      |
| O (wt%) (by difference)                 | 46.5      | 49.9      |
| Proximate analysis                      |           |           |
| Moisture (wt%)                          | 6.0       | 14.8      |
| Ash (wt%)                               | 4.0       | 2.4       |
| Fixed carbon (wt%)                      | 17.2      | 26.4      |
| Volatiles (wt%)                         | 72.8      | 56.4      |
| HHV (MJ/kg)                             | 16.4      | 16.0      |

**Table S2.** Steel slag metal composition.

| <b>Element</b> | <b>Metal Content</b> | <b>Element</b> | <b>Metal Content</b> |
|----------------|----------------------|----------------|----------------------|
| Ca             | 30.6 (wt%)           | Sr             | 169.5 (ppm)          |
| Fe             | 24.1 (wt%)           | Pb             | 147.5 (ppm)          |
| Mg             | 4.9 (wt%)            | Sn             | 30.5 (ppm)           |
| Mn             | 1.9 (wt%)            | Zr             | 22.0 (ppm)           |
| Si             | 1.9 (wt%)            | Sb             | 17.5 (ppm)           |
| Al             | 1.3 (wt%)            | Cu             | 14.0 (ppm)           |
| P              | 0.59 (wt%)           | Zn             | 14.0 (ppm)           |
| Ti             | 0.59 (wt%)           | Bi             | 11.5 (ppm)           |
| V              | 0.50 (wt%)           | Ce             | 5.5 (ppm)            |
| Na             | 0.42 (wt%)           | Lu             | 4.0 (ppm)            |
| K              | 0.20 (wt%)           | Mo             | 4.0 (ppm)            |
| Cr             | 0.18 (wt%)           | Li             | 3.0 (ppm)            |
| B              | 219.0 (ppm)          | Y              | 3.0 (ppm)            |
| Ba             | 205.0 (ppm)          | Ni             | 2.5 (ppm)            |
| Ga             | 177.0 (ppm)          | Er             | 2.0 (ppm)            |

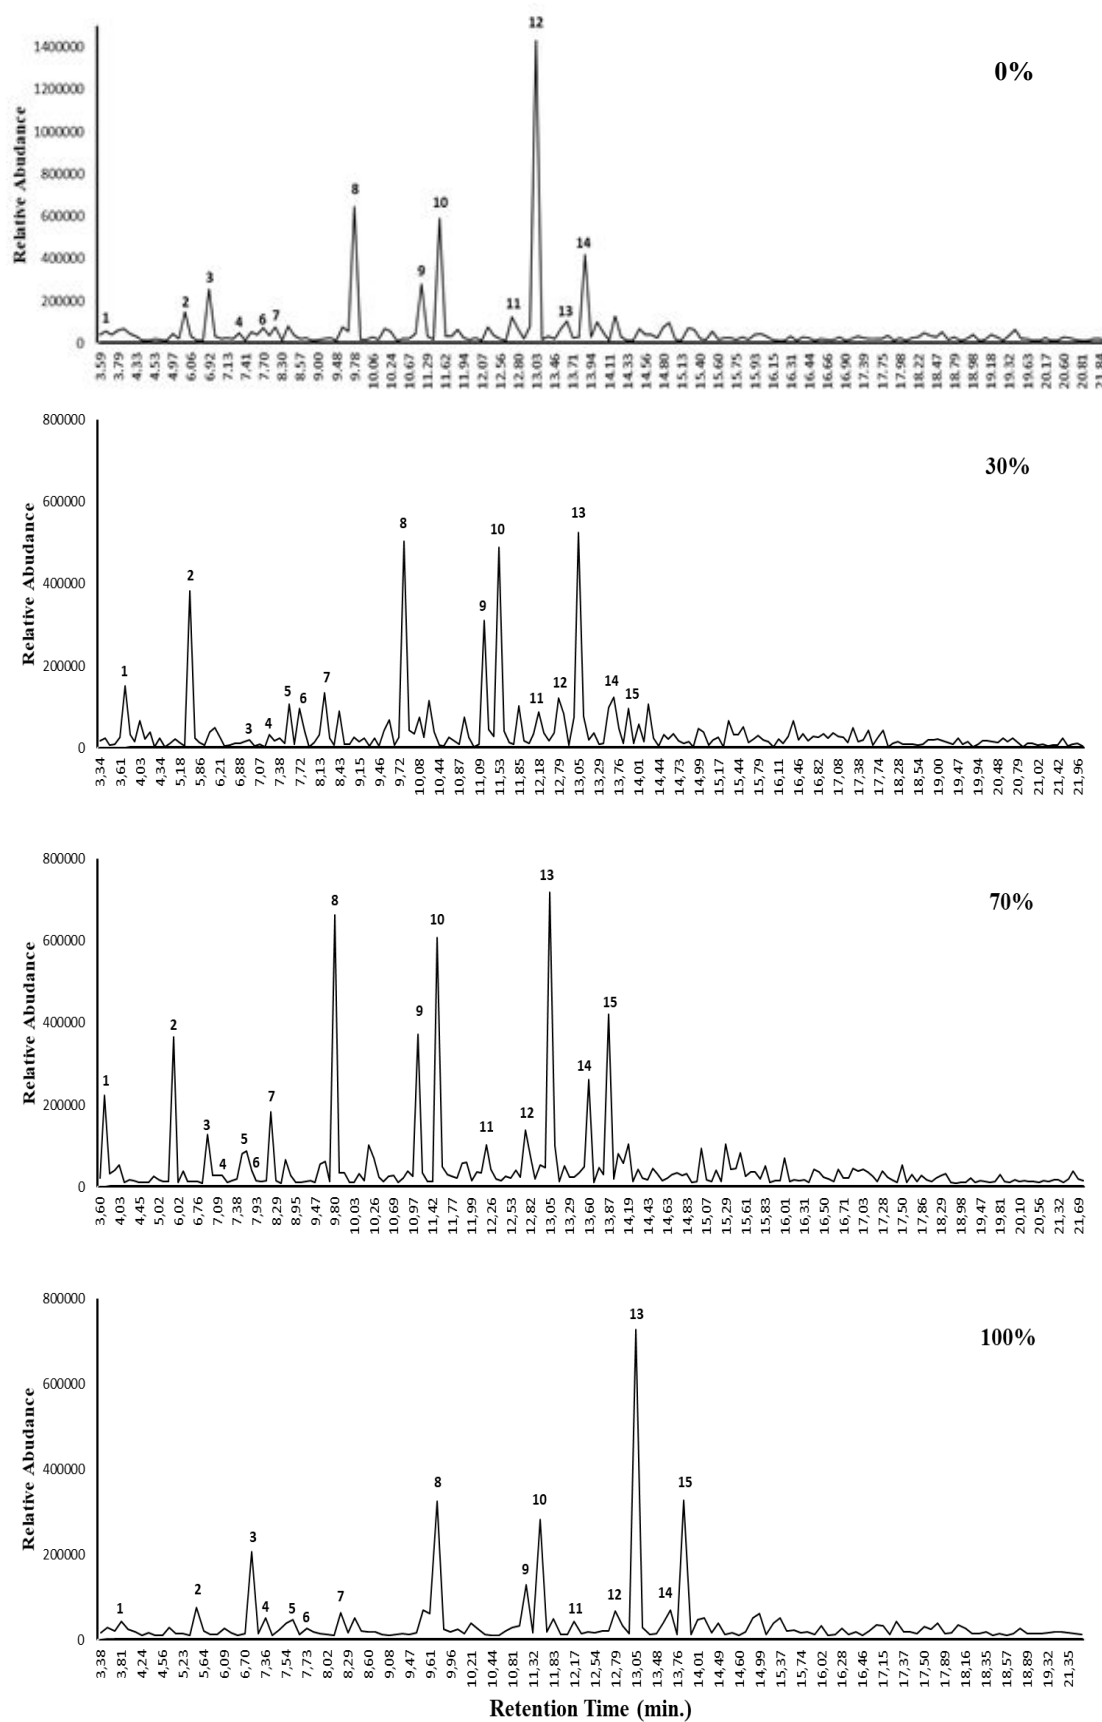

**Figure S3.** GC-MS chromatograms of SB bio-oil and compounds detected at 400 and 500 °C (pyrolysis and reforming temperatures) and different SS ratios in the reformer.

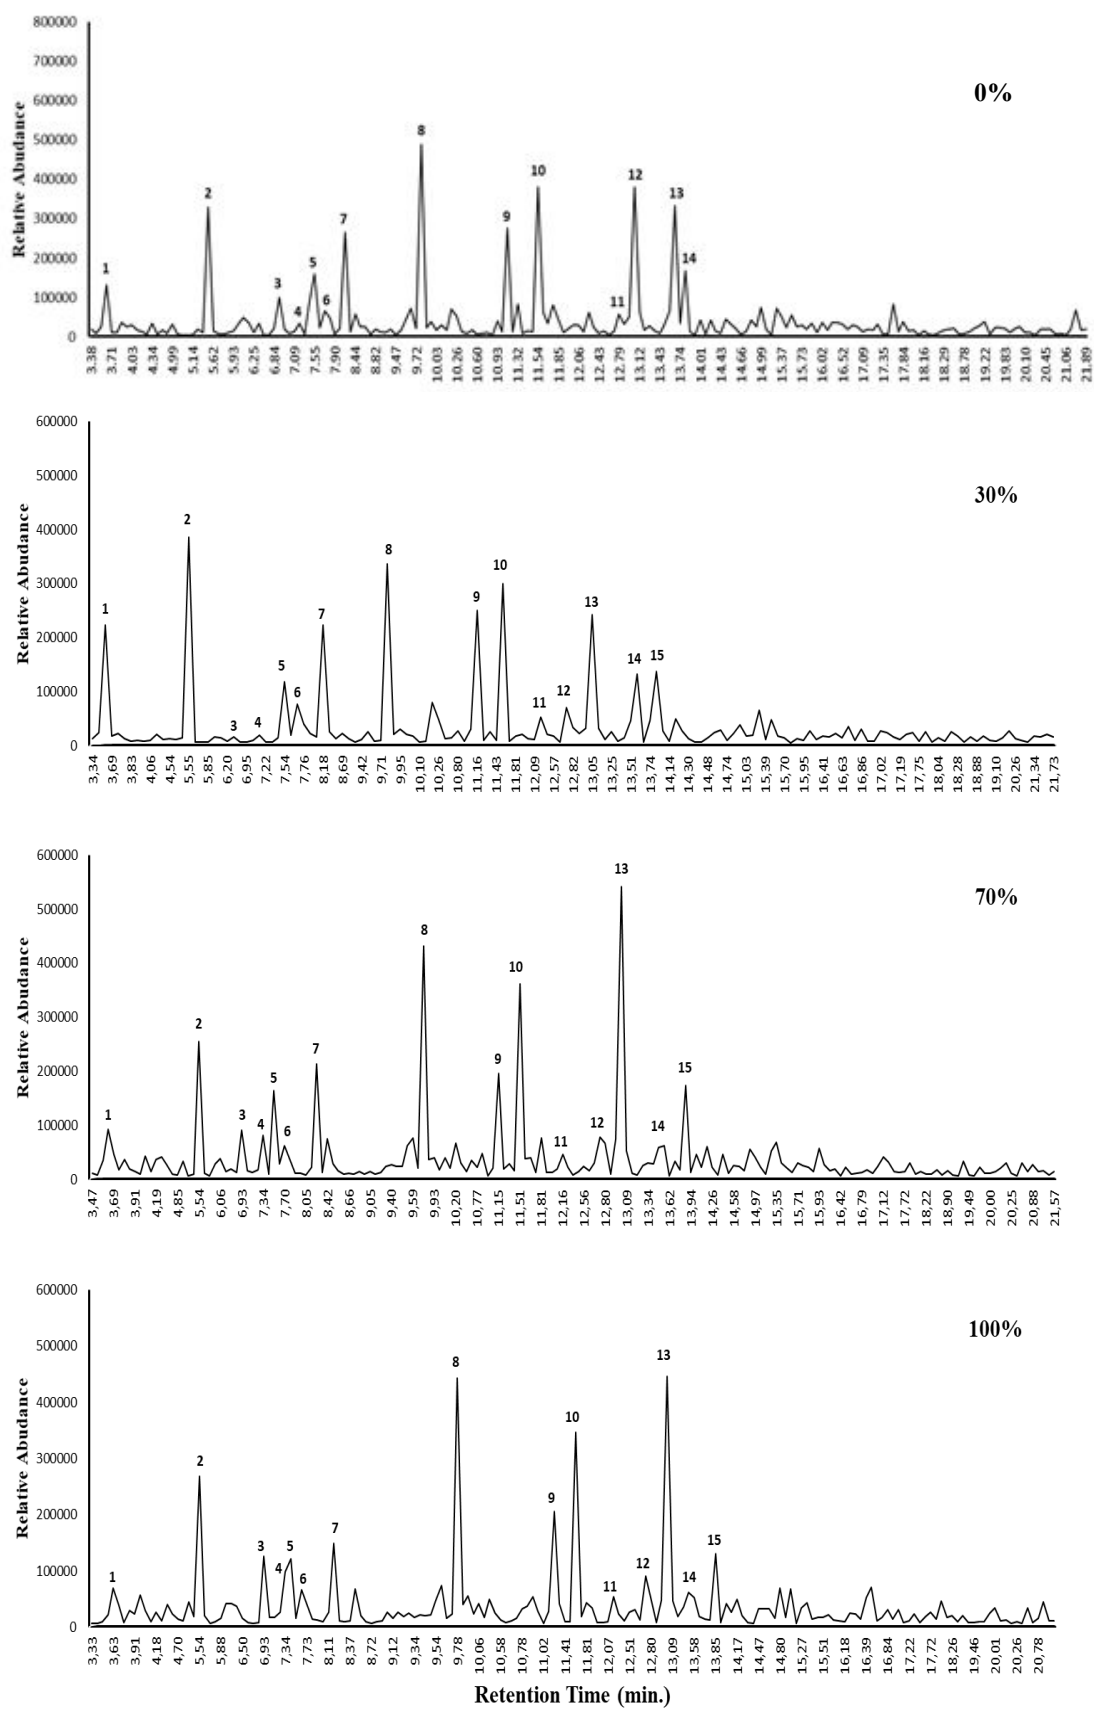

**Figure S4.** GC-MS chromatograms of OH bio-oil and compounds detected at 400 and 500 °C (pyrolysis and reforming temperatures) and different SS ratios in the reformer.

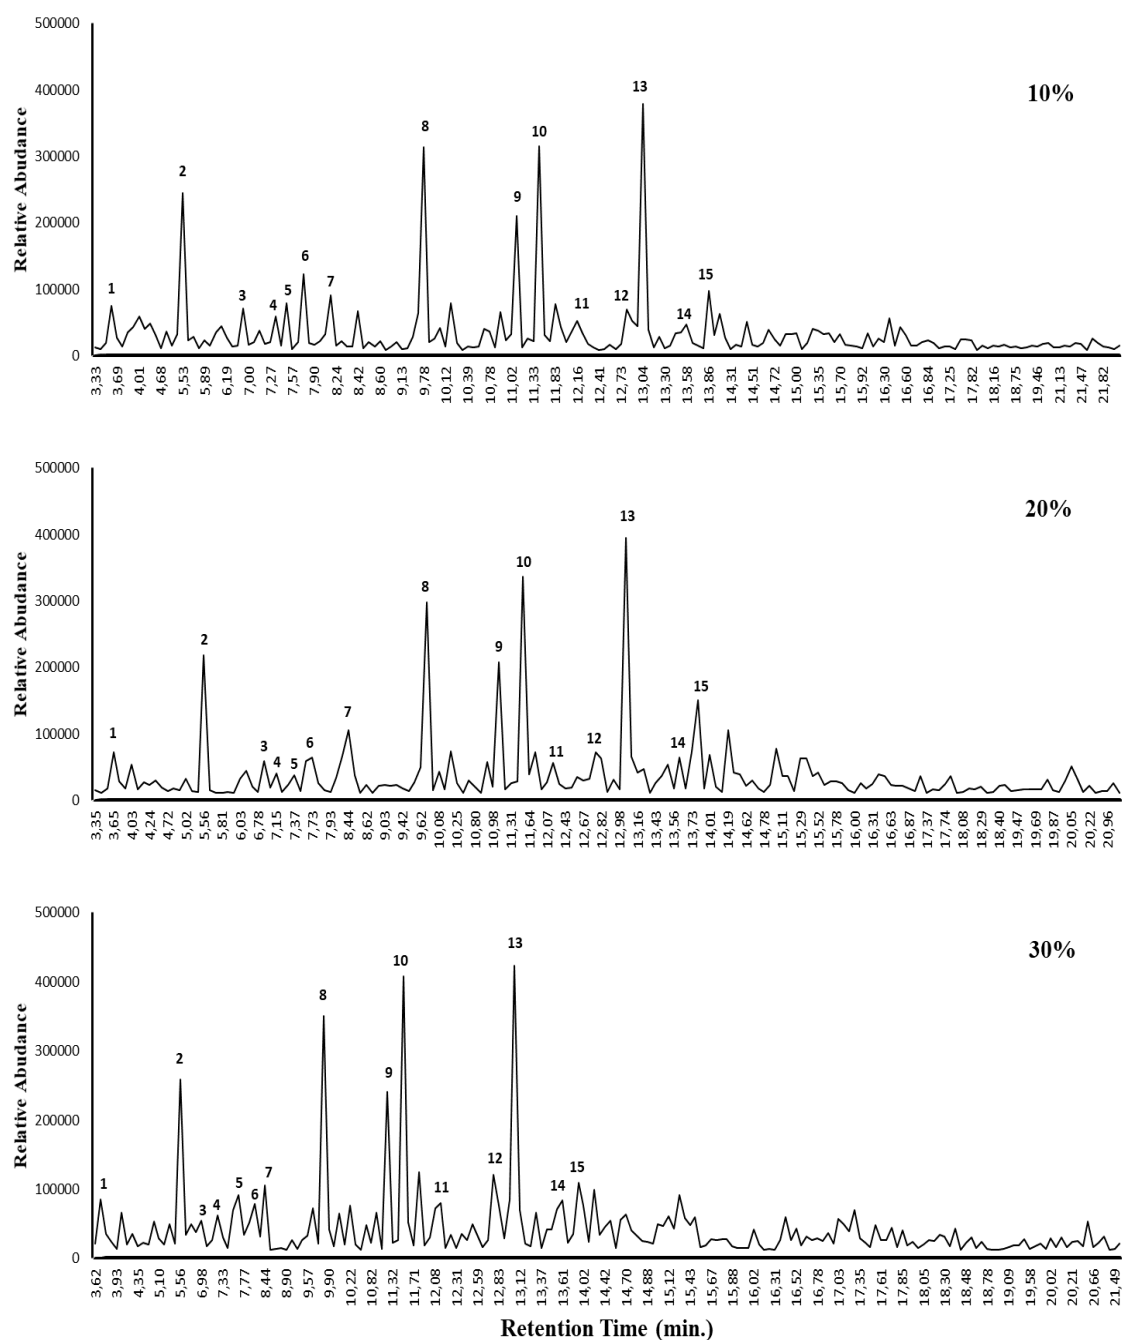

**Figure S5.** GC-MS chromatograms of OH bio-oil and compounds detected at 400 and 500 °C (pyrolysis and reforming temperatures) and different SS ratios in the OH feed.

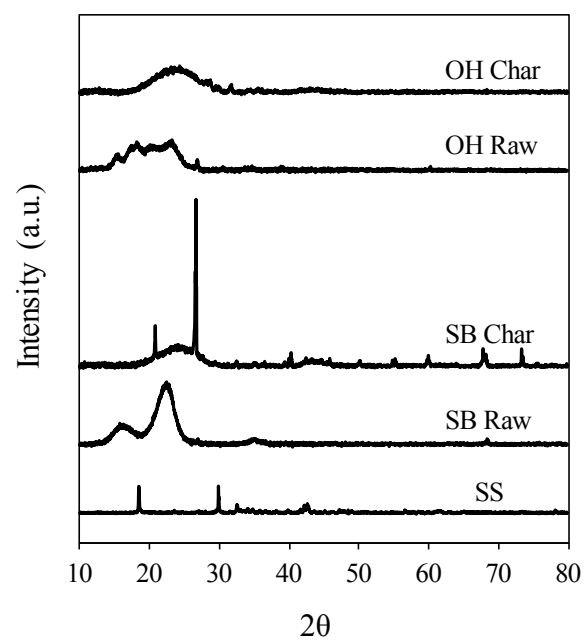

**Figure S6.** X-ray diffractions of SS, SB raw, SB char, OH raw and OH char.
